# Supplementary material for: Expression of ncRNAs on the DLK1-DIO3 Locus Is Associated With Basal and Mesenchymal Phenotype in Breast Epithelial Progenitor Cells
Source: PubMed Central journal article supplement (PMC7308478; doi:10.3389/fcell.2020.00461), 2020-06-16
Supplement: Data_Sheet_1.pdf [file Data_Sheet_1.pdf]

## Supplementary material

Antibodies for western blot: CDH1 (E-cadherin, BD Transduction Labs, 610182), CDH2 (N-cadherin, BD Transduction Labs, 610921)

Primers for qRT-PCR: *ALDH1A3* (IDT, Hs.PT.56a.657970), *INTGA6* (IDT, Hs.PT.58.453862).

### Supplementary methods

#### Cell proliferation assay

Cell proliferation assay was performed on IncuCyte Zoom microscope (Essen Bioscience) according to manufacturer's protocol. Cells were plated at density  $10 \times 10^3$ /well in 96 - well plate (Corning, 353072). Cell culture media was changed three times per week.

#### Cell invasion assay

Cell invasion was examined using transwell filters with 8  $\mu\text{m}$  pore size (Corning, 353097) with a layer of Matrigel, diluted 1:10 with H14 media. Briefly,  $3 \times 10^3$  cells were resuspended in 250  $\mu\text{l}$  H14 medium and placed on top of Matrigel and 500  $\mu\text{l}$  of H14 + 10% FBS was added to the lower chambers, below filter. Cell were incubated for 48 hours in 5%  $\text{CO}_2$  at 37°C. After incubation, the Matrigel was removed as well as non-invasive cells from the upper part of the filter with cotton swab and washed in between 3 x with 1 x PBS. The filters were then fixed with methanol and stained with DAPI. Cell were photographed in three random fields. Pictures were analysed with ImageJ Software.

#### Scratch wound assay

The assay was performed according to manufacturer's protocol.  $6 \times 10^3$  cells/well were seeded so they were 100% confluent following day into ImageLock Plates (Essen Bioscience, 4379). Woundmaker (Essen Bioscience, 4493) was used to do the scratch. The images were taken every two hours. Images were analysed as *Relative Wound Density* (%).

#### Statistical analysis

Statistical differences of qRT-PCRs (Supplementary Figure 6) and functional assay (Supplementary Figure 5B) between samples were assessed with paired Student t-test. Statistical differences in Supplementary Figure 5A and 5C was calculated using multiple unpaired Student t-test per row. Statistical differences of quantifications of western blots (Supplementary Figure 4) among samples were assessed using one-way ordinary ANOVA, followed by Tukey's multiple comparison test. *P* values below 0.05 were considered significant ( $*p \leq 0.05$ ;  $**p \leq 0.01$ ;  $***p \leq 0.001$ ;  $****p \leq 0.0001$ ). All statistical analysis was performed in GraphPad Prism.

## Supplementary Figures

| Name       | Fold change | P-value |
|------------|-------------|---------|
| mir-370    | 4,49        | 0.0016  |
| mir-1185-2 | 3,97        | 0.0504  |
| mir-770    | 3,95        | 0.0166  |
| mir-376a-2 | 3,74        | 0.0612  |
| mir-494    | 3,61        | 0.0032  |
| mir-382    | 3,46        | 0.0144  |
| mir-654    | 3,23        | 0.0054  |
| mir-541    | 3,20        | 0.2823  |
| mir-337    | 3,18        | 0.0085  |
| mir-485    | 2,80        | 0.0139  |
| mir-299    | 2,77        | 0.0172  |
| mir-1185-1 | 2,56        | 0.0547  |
| mir-377    | 2,56        | 0.0398  |
| mir-127    | 2,53        | 0.0307  |
| mir-376a-1 | 2,47        | 0.0475  |
| mir-758    | 2,33        | 0.0549  |
| mir-493    | 2,32        | 0.0374  |
| mir-487b   | 2,31        | 0.0563  |
| mir-369    | 2,18        | 0.0640  |
| mir-432    | 2,17        | 0.0738  |
| mir-154    | 2,13        | 0.0954  |
| mir-543    | 2,10        | 0.1642  |
| mir-134    | 2,09        | 0.2873  |
| mir-656    | 2,03        | 0.1442  |
| mir-412    | 1,96        | 0.1800  |
| mir-379    | 1,93        | 0.1593  |
| mir-411    | 1,85        | 0.1140  |
| mir-668    | 1,82        | 0.2650  |
| mir-380    | 1,70        | 0.3259  |
| mir-431    | 1,69        | 0.3057  |
| mir-376c   | 1,65        | 0.2135  |
| mir-381    | 1,55        | 0.5539  |
| mir-323b   | 1,54        | 0.3447  |
| mir-495    | 1,34        | 0.5132  |
| mir-433    | 1,31        | 0.5713  |
| mir-487a   | 1,30        | 0.6391  |
| mir-655    | 1,28        | 0.5625  |
| mir-655    | 1,28        | 0.5625  |
| mir-410    | 1,26        | 0.5627  |
| mir-1197   | 1,26        | 0.6935  |
| mir-539    | 1,16        | 0.7161  |
| mir-496    | 1,08        | 0.8971  |
| mir-376b   | 1,06        | 0.8880  |
| mir-136    | 1,01        | 0.8938  |
| mir-409    | -1,37       | 0.6847  |
| mir-323    | #N/A        | #N/A    |
| mir-329-1  | #N/A        | #N/A    |
| mir-329-2  | #N/A        | #N/A    |
| mir-300    | #N/A        | #N/A    |
| mir-889    | #N/A        | #N/A    |
| mir-544    | #N/A        | #N/A    |

**Supplementary Figure 1.** The ncRNAs from DLK1-DIO3 locus have increased expression in mesenchymal cells. Majority of the miRNAs from the DLK1-DIO3 locus are upregulated in D492M compared to D492. Small RNA sequencing: the list of miRNAs from the DLK1-DIO3 locus, where majority of them are upregulated in D492M.

**(A)**

| no | term                               | count | %       | p-value  |
|----|------------------------------------|-------|---------|----------|
| 1  | Extracellular matrix               | 26    | 1.45903 | 1.56E-14 |
| 2  | Proteinaceous extracellular matrix | 25    | 1.40292 | 2.62E-14 |
| 3  | Cell adhesion                      | 35    | 1.96409 | 1.33E-13 |
| 4  | Cell attachment site               | 15    | 0.84175 | 1.33E-13 |
| 5  | Biological adhesion                | 35    | 1.96409 | 1.38E-13 |
| 6  | Extracellular matrix               | 21    | 1.17845 | 2.06E-13 |
| 7  | Extracellular region part          | 38    | 2.13244 | 1.63E-12 |
| 8  | Cell adhesion                      | 25    | 1.40292 | 2.77E-12 |
| 9  | Signal                             | 71    | 3.98429 | 6.65E-12 |
| 10 | Signal peptide                     | 71    | 3.98429 | 8.99E-12 |
| 11 | EGF-like domain                    | 19    | 1.06622 | 9.40E-12 |
| 12 | AGF calcium-binding                | 13    | 0.72952 | 1.10E-11 |
| 13 | Extracellular region               | 54    | 3.0303  | 2.07E-11 |
| 14 | EGF-like, type 3                   | 18    | 1.0101  | 2.25E-11 |
| 15 | EGF-like region, conserved site    | 21    | 1.17845 | 3.50E-11 |

**(B)**

| Spearman correlation with <i>MEG3</i> |               |          |               |           |
|---------------------------------------|---------------|----------|---------------|-----------|
|                                       | Normal breast |          | Breast cancer |           |
| Mesenchymal markers                   | rho           | p-val    | rho           | p-val     |
| <i>ACTA2</i>                          | 0.098         | 7.64E-02 | 0.526         | 1.03E-80  |
| <i>AXL</i>                            | 0.196         | 3.31E-04 | 0.455         | 3.36E-58  |
| <i>CD61 (ITGB3)</i>                   | 0.288         | 9.45E-08 | 0.284         | 3.18E-22  |
| <i>CDH2</i>                           | 0             | 9.99E-01 | 0.156         | 1.57E-07  |
| <i>FOSL2</i>                          | 0.451         | 4.97E-18 | 0.249         | 2.95E-17  |
| <i>FOXC1</i>                          | 0.138         | 1.20E-02 | 0.121         | 5.09E-05  |
| <i>FOXC2</i>                          | 0.304         | 1.57E-08 | 0.3           | 1.11E-24  |
| <i>LAMA1</i>                          | 0.236         | 1.42E-05 | 0.467         | 8.03E-62  |
| <i>LOX</i>                            | 0.165         | 2.55E-03 | 0.398         | 1.10E-43  |
| <i>MMP2</i>                           | 0.45          | 6.60E-18 | 0.656         | 9.34E-139 |
| <i>SMAD4</i>                          | 0.091         | 9.86E-02 | 0.017         | 5.81E-01  |
| <i>SNAI1</i>                          | 0.169         | 2.09E-03 | 0.163         | 3.82E-08  |
| <i>SNAI2</i>                          | 0.092         | 9.65E-02 | 0.469         | 2.01E-62  |
| <i>TGFB1</i>                          | 0.628         | 1.10E-37 | 0.508         | 2.59E-74  |
| <i>TWIST1</i>                         | 0.405         | 1.71E-14 | 0.516         | 3.14E-77  |
| <i>TWIST2</i>                         | 0.357         | 2.20E-11 | 0.636         | 3.81E-128 |
| <i>VIM</i>                            | 0.01          | 8.54E-01 | 0.437         | 2.23E-53  |
| <i>YAP1</i>                           | -0.287        | 1.07E-07 | 0.191         | 1.28E-10  |
| <i>ZEB1</i>                           | 0.2           | 2.45E-04 | 0.498         | 3.28E-71  |
| <i>ZEB2</i>                           | 0.277         | 3.89E-07 | 0.462         | 3.68E-60  |

**Supplementary Figure 2.** *MEG3* correlates with expression of mesenchymal genes. **(A)** *MEG3* correlates with expression of extracellular matrix genes. *MEG3* correlated pathway analysis (GOBO). **(B)** *MEG3* correlates with expression of mesenchymal genes in normal breast and breast cancer tissue. Listed mesenchymal genes shows positive correlation with *MEG3* in MiPanda dataset. The Spearman correlation above 0.3 is considered as fair positive correlation are highlighted in orange.

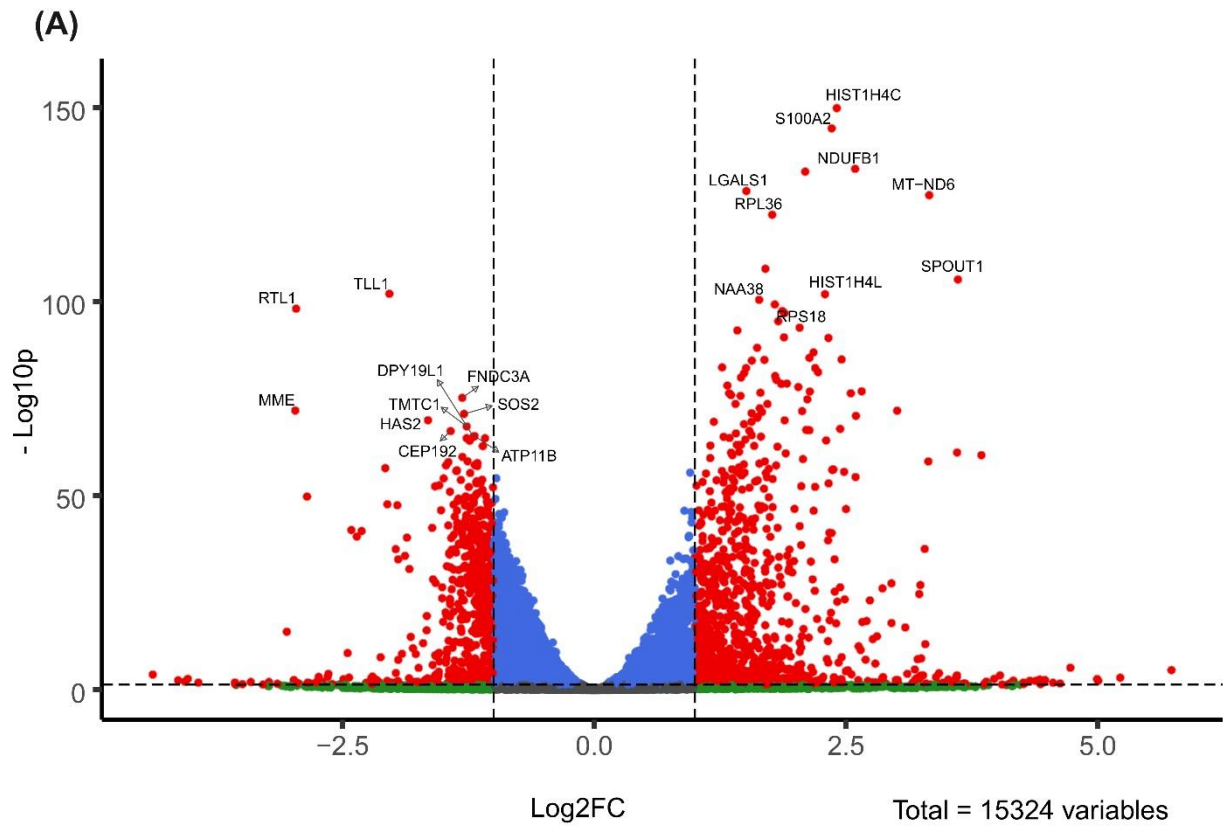

**(B)**Top 30 downregulated genes in D492M<sup>KD-MEG3</sup>

| Gene              | Log2 FC | p value   |
|-------------------|---------|-----------|
| <i>AC011005.1</i> | -1.91   | 5.80E-10  |
| <i>ADGRL3</i>     | -1.77   | 6.60E-10  |
| <i>ADGRL4</i>     | -3.05   | 1.20E-15  |
| <i>CFH</i>        | -2.07   | 8.20E-58  |
| <i>CLDN24</i>     | -1.97   | 5.10E-05  |
| <i>CSMD3</i>      | -2.2    | 4.20E-04  |
| <i>DCT</i>        | -2.43   | 8.10E-04  |
| <i>EMB</i>        | -2.05   | 1.70E-48  |
| <i>GALNT3</i>     | -2.85   | 1.80E-50  |
| <i>GRIK2</i>      | -2.64   | 8.60E-05  |
| <i>HOOK1</i>      | -1.95   | 2.10E-08  |
| <i>HS6ST3</i>     | -4.38   | 1.30E-04  |
| <i>LRRCC1</i>     | -1.8    | 2.10E-11  |
| <i>MME</i>        | -2.97   | 1.20E-72  |
| <i>PKHD1L1</i>    | -2.12   | 4.40E-09  |
| <i>PKIA</i>       | -2.36   | 3.50E-40  |
| <i>POSTN</i>      | -2.45   | 3.70E-10  |
| <i>POTEE</i>      | -2.31   | 1.30E-41  |
| <i>POTEJ</i>      | -2.41   | 7.40E-42  |
| <i>RASEF</i>      | -1.86   | 6.70E-40  |
| <i>RGPD2</i>      | -1.82   | 2.40E-14  |
| <i>RGPD3</i>      | -1.88   | 3.30E-35  |
| <i>RTL1</i>       | -2.96   | 6.70E-99  |
| <i>SETSIP</i>     | -1.97   | 6.20E-37  |
| <i>SULF1</i>      | -1.96   | 3.00E-48  |
| <i>TLL1</i>       | -2.03   | 9.90E-103 |
| <i>ZC3H11B</i>    | -1.84   | 8.00E-32  |
| <i>ZDBF2</i>      | -2.74   | 5.10E-04  |
| <i>ZFY</i>        | -2.65   | 5.40E-04  |
| <i>ZNF711</i>     | -1.95   | 2.70E-34  |

Top 30 upregulated genes in D492M<sup>KD-MEG3</sup>

| Gene             | Log2 FC | p value   |
|------------------|---------|-----------|
| <i>APOA1</i>     | 3.28    | 5.40E-37  |
| <i>AZU1</i>      | 3.24    | 2.70E-04  |
| <i>C1orf232</i>  | 2.87    | 5.60E-04  |
| <i>C1QTNF5</i>   | 3.11    | 8.30E-05  |
| <i>CLDND2</i>    | 3.32    | 1.50E-59  |
| <i>FFAR1</i>     | 3.42    | 5.90E-05  |
| <i>FOXN1</i>     | 2.95    | 6.80E-18  |
| <i>GNG8</i>      | 3.21    | 1.40E-08  |
| <i>GSG1L2</i>    | 3.6     | 2.00E-04  |
| <i>GUCY1A2</i>   | 3.24    | 1.10E-27  |
| <i>HBZ</i>       | 3.09    | 9.30E-17  |
| <i>HCRT</i>      | 3.27    | 2.00E-04  |
| <i>HRC</i>       | 2.86    | 8.10E-27  |
| <i>IL13RA2</i>   | 3.18    | 6.20E-06  |
| <i>IYD</i>       | 3.6     | 7.40E-04  |
| <i>MT-ND3</i>    | 3.01    | 1.30E-72  |
| <i>MT-ND6</i>    | 3.33    | 3.90E-128 |
| <i>MTRNR2L1</i>  | 5.22    | 8.40E-04  |
| <i>MTRNR2L12</i> | 3.29    | 1.90E-12  |
| <i>NRXN1</i>     | 4.73    | 2.20E-06  |
| <i>OR5AU1</i>    | 3.39    | 6.10E-04  |
| <i>POU2F3</i>    | 3.84    | 3.80E-61  |
| <i>PSORS1C2</i>  | 3.23    | 2.30E-25  |
| <i>RPS29</i>     | 2.95    | 4.00E-28  |
| <i>S100A8</i>    | 3.25    | 8.90E-09  |
| <i>SPINK1</i>    | 4.03    | 2.00E-04  |
| <i>SPOUT1</i>    | 3.61    | 2.00E-106 |
| <i>TCF23</i>     | 3.6     | 6.10E-04  |
| <i>TSPAN19</i>   | 3.6     | 7.60E-62  |
| <i>UPK3BL1</i>   | 5.73    | 8.90E-06  |

**Supplementary Figure 3.** RNA-sequencing analysis of D492M<sup>KD-MEG3</sup> vs. D492M<sup>KD-MEG3</sup>. (A) Volcano plot over all data ( $q < 0.05$ , TPM > 1) showing symmetric distribution of the RNA-sequencing data. The top ten downregulated and top ten upregulated genes according log2 fold change in D492M<sup>KD-MEG3</sup> are labelled with gene names. (B) The table with top 30 downregulated genes in D492M<sup>KD-MEG3</sup> (left) and top 30, upregulated genes in D492M<sup>KD-MEG3</sup> (right).

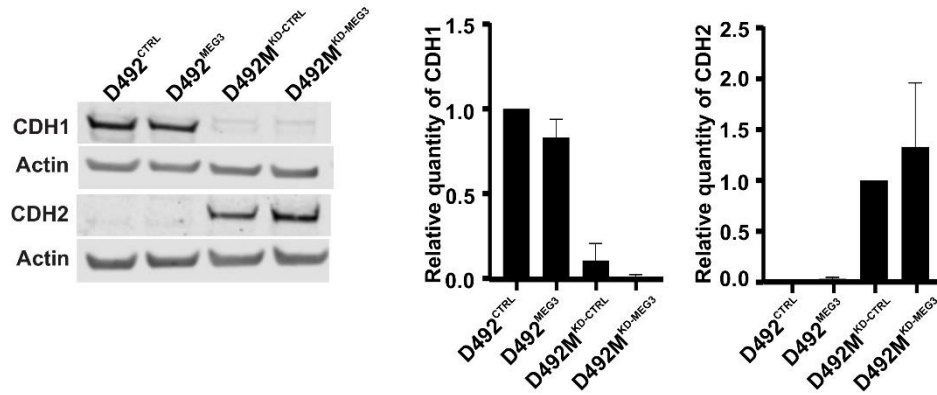

**Supplementary Figure 4.** *MEG3* does not change expression of CDH1 and CDH2. Representative pictures of western blot (WB) with its quantification below. D492<sup>MEG3</sup> has slightly decreased CDH1 (E-cad) on protein level compared to D492<sup>CTRL</sup>. D492M<sup>KD-MEG3</sup> has slightly increased CDH2 (N-cad) on protein level compared to D492M<sup>KD-CTRL</sup>, however with no statistical significance WB results shown as mean  $\pm$  SD. One-way ordinary ANOVA followed by Tukey's multiple comparison test was used to test significance; n = 3.

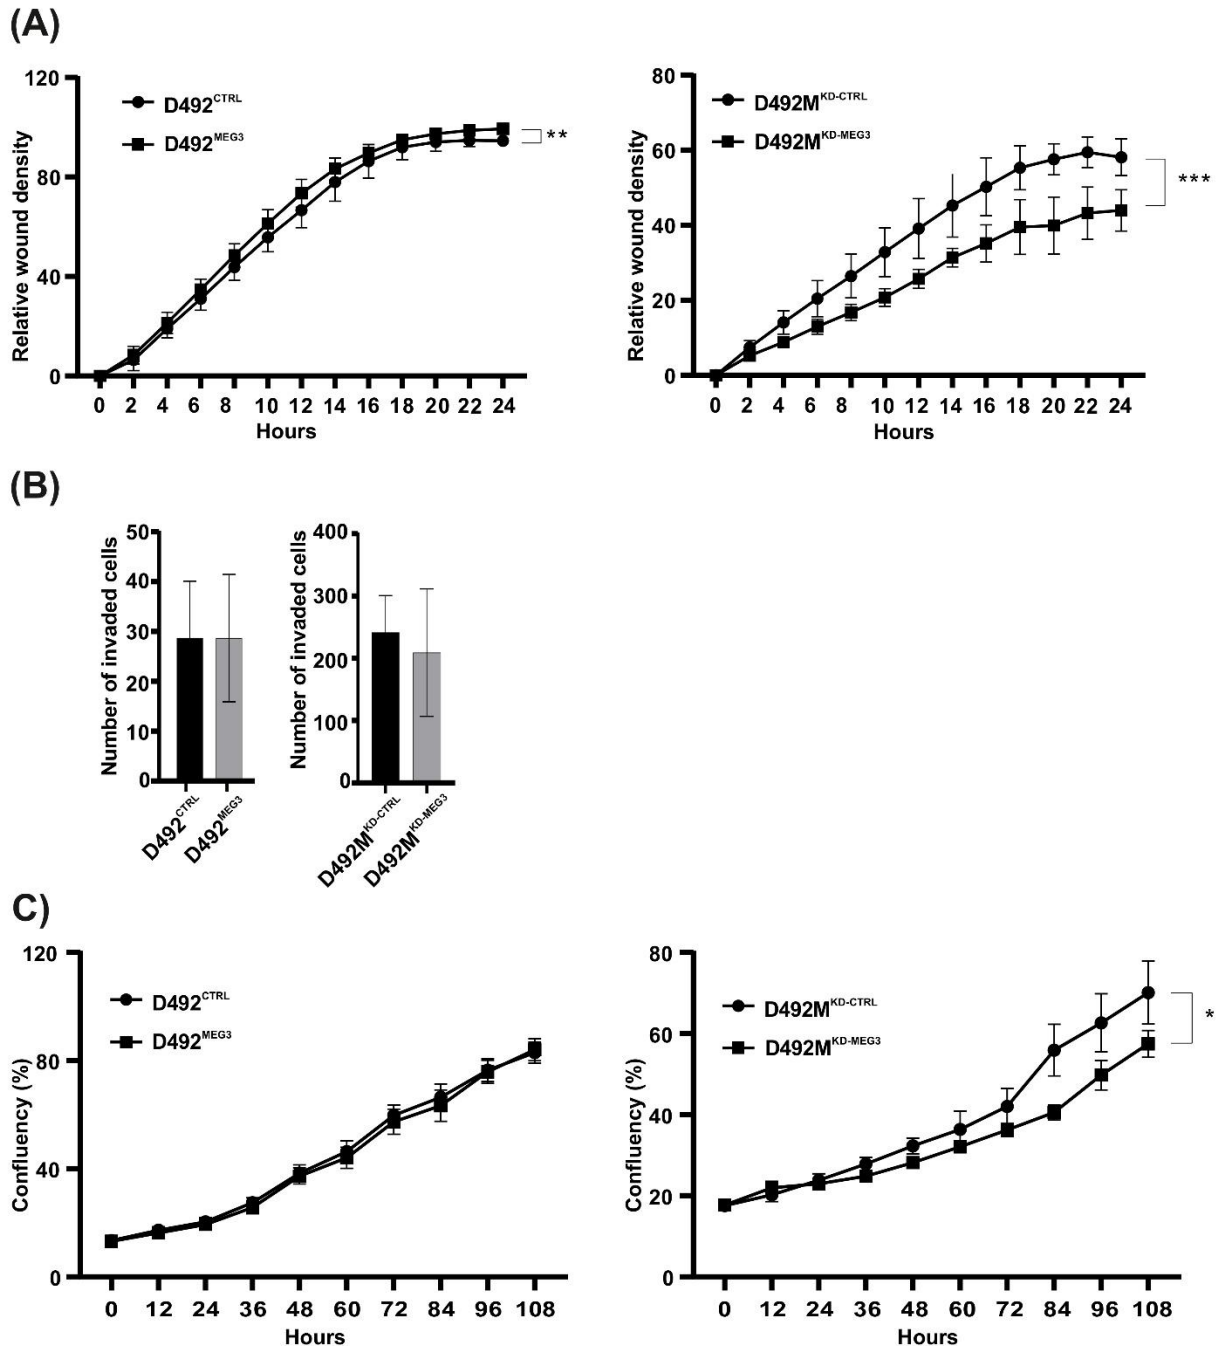

**Supplementary Figure 5.** *MEG3* does not influence invasion but has effect on wound healing migration. (A) *MEG3* slightly increase wound healing migration and knock-down of *MEG3* decrease wound healing migration. D492<sup>MEG3</sup> has slightly increased migration rate compared to D492<sup>CTRL</sup> (left). D492M<sup>KD-MEG3</sup> migrates less compared to D492M<sup>KD-CTRL</sup> (right). Data is analysed on Incucyte Zoom and results displayed as Relative wound density with mean  $\pm$  SD. Multiple unpaired Student t-test per row was used to test significance,  $n = 6$ ; \*\*  $p \leq 0.01$ ; \*\*\*  $p \leq 0.001$ ; with statistical differences at 24-hour timepoint. (B) *MEG3* and knock-down of *MEG3* does not have effect on invasion. D492<sup>MEG3</sup> has comparable invasion rate with D492<sup>CTRL</sup> (left). As well as D492M<sup>KD-MEG3</sup> has comparable invasion rate with D492M<sup>KD-CTRL</sup> (right). Quantification of number

of invaded cells shown as mean  $\pm$  SD. Unpaired t-test was used to test significance,  $n = 6$ . (C) *MEG3* does not have effect on proliferation, while knock-down of *MEG3* has. Proliferation assay: D492<sup>MEG3</sup> has comparable proliferation rate with D492<sup>CTRL</sup> (left). D492M<sup>KD-MEG3</sup> slightly reduced proliferation rate compared to D492M<sup>KD-CTRL</sup> (right). Data is analysed on Incucyte Zoom and results displayed as Confluency percentage as mean  $\pm$  SD. Multiple unpaired Student t-test per row was used to test significance at 24-hour time point;  $n = 6$ ;  $*p \leq 0.05$ .

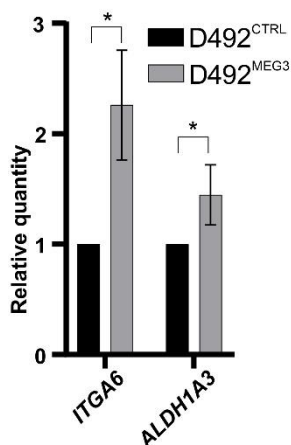

**Supplementary Figure 6.** *MEG3* increases expression of stem cell marker *ITGa6* and *ALDH1A3*. qRT-PCR showing D492<sup>MEG3</sup> has increased expression of *ITGa6* (Integrin alpha 6) and *ALDH1A3* (Aldehyde dehydrogenase) compared to D492<sup>CTRL</sup>. Results shown as mean  $\pm$  SD. Unpaired t-test was used to test significance:  $* p \leq 0.05$ ;  $n = 3$ .
